# Supplementary material for: Surface-active drug loaded lipopolymeric nanohybrid aerosol therapy: potential non-invasive way to mitigate lipopolysaccharide mediated inflammation in murine lungs
Source: Royal Society of Chemistry journal article supplement (doi:10.1039/c4ra13558j), 2015-01-01

## Supplementary

S1

### Chest X- Rays of

(a) LPS + TPGS-LPH treated mouse

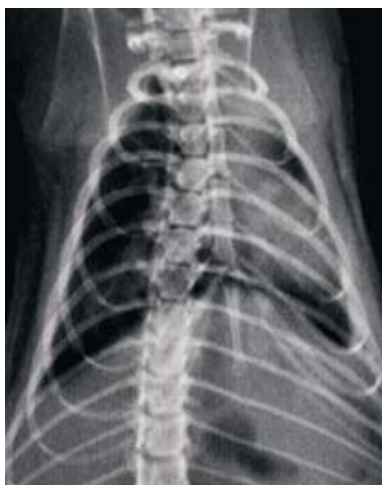

(b) LPS + DXP-NV treated mouse

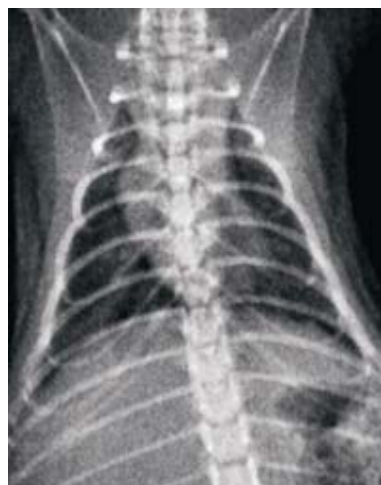

S2

### H & E stained lung tissues of

(a) LPS + TPGS-LPH treated mouse

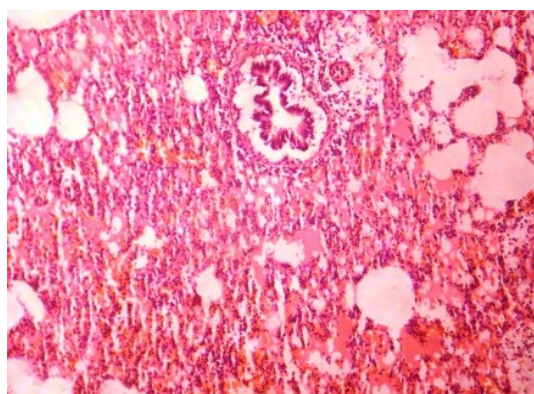

(b) LPS + DXP-NV treated mouse

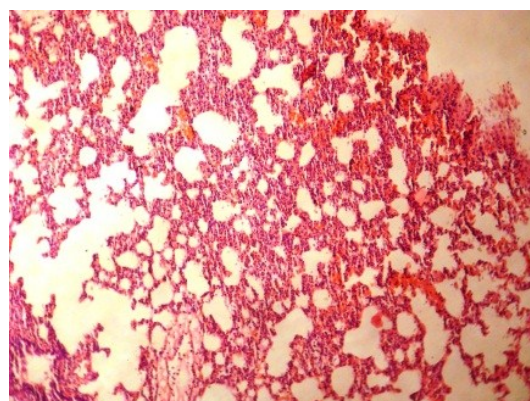

Supplement: c4ra13558j1.pdf [file c4ra13558j1.pdf]
